# Supplementary material for: Photo-reduction of heavy metal ions and photo-disinfection of pathogenic bacteria under simulated solar light using photosensitized TiO2 nanofibers
Source: Royal Society of Chemistry journal article supplement (doi:10.1039/c8ra01237g), 2018-01-01
Supplement: c8ra01237g1.pdf [file c8ra01237g1.pdf]

### Electronic Supplementary Information

Title:

Photo-reduction of heavy metal ions and photo-disinfection of pathogenic bacteria under simulated solar light using photosensitized TiO<sub>2</sub> nanofibers

Authors:

Samina Ghafoor,<sup>a,b</sup> Syed Zajif Hussain,<sup>a</sup> Sadia Waseem<sup>b</sup>, and Salman Noshear Arshad<sup>a,\*</sup>

Affiliation:

<sup>a</sup> Department of Chemistry and Chemical Engineering, Syed Babar Ali School of Science and Engineering, Lahore University of Management Sciences, Lahore 54792, Pakistan.

<sup>b</sup> Institute of Chemistry, University of the Punjab, P.O. Box 54590, Lahore, Pakistan.

\* Corresponding Author:

salman.arshad@lums.edu.pk

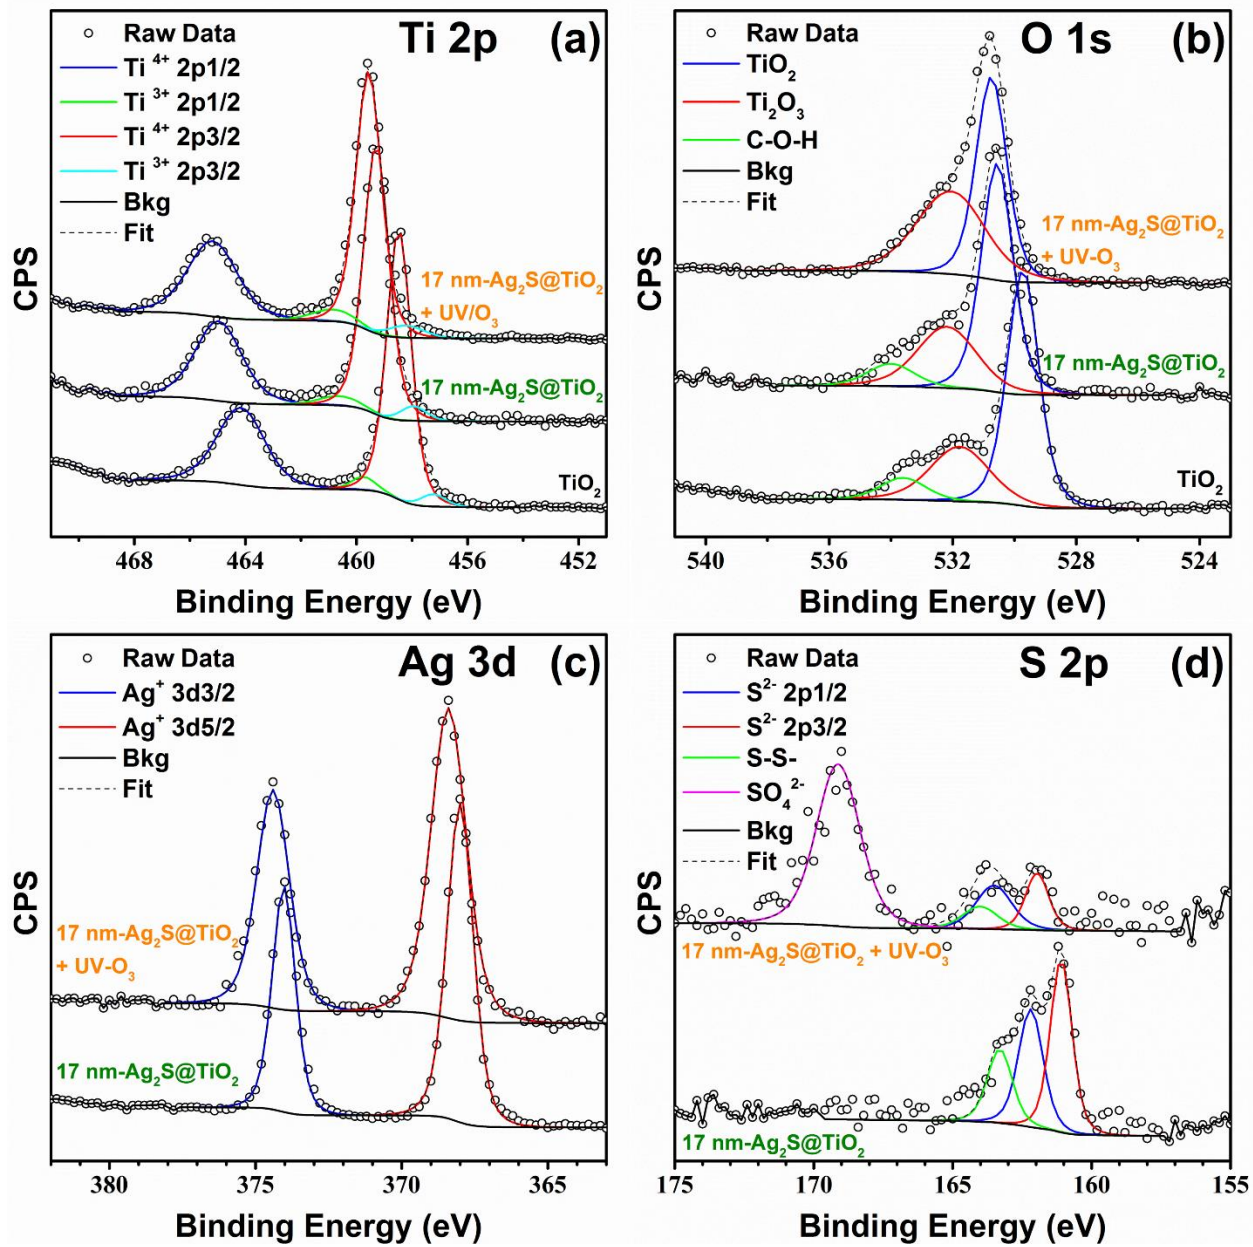

**Fig. S1.** High resolution XPS spectra of pure  $\text{TiO}_2$  and  $\text{Ag}_2\text{S}/\text{TiO}_2$  samples. (a) Ti 2p, (b) O 1s, (c) Ag 3d, and (d) S 2p. The figure is reproduced from our previous work [\*,], available under the Creative Commons Attribution 4.0 International Public License.

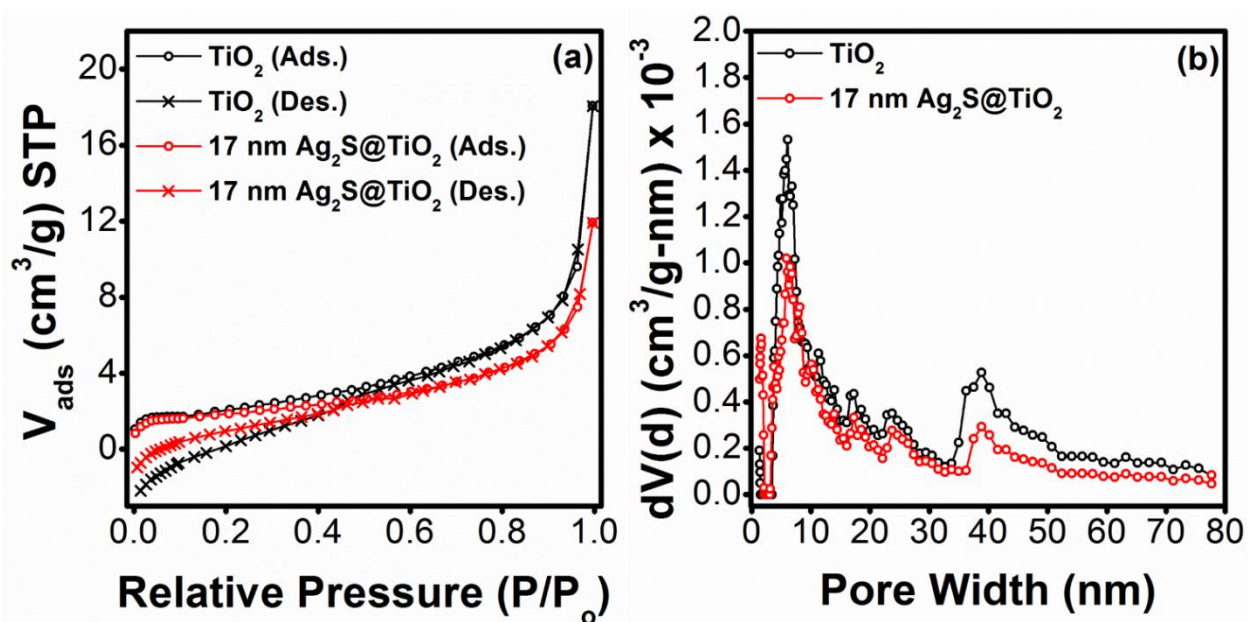

**Fig. S2.** (a) Nitrogen adsorption-desorption isotherms for pure  $\text{TiO}_2$  NFs and 17 nm- $\text{Ag}_2\text{S}/\text{TiO}_2$  composite nanofibers, and (b) the corresponding pore size distributions. *The figure is reproduced from our previous work [\*], available under the Creative Commons Attribution 4.0 International Public License.*

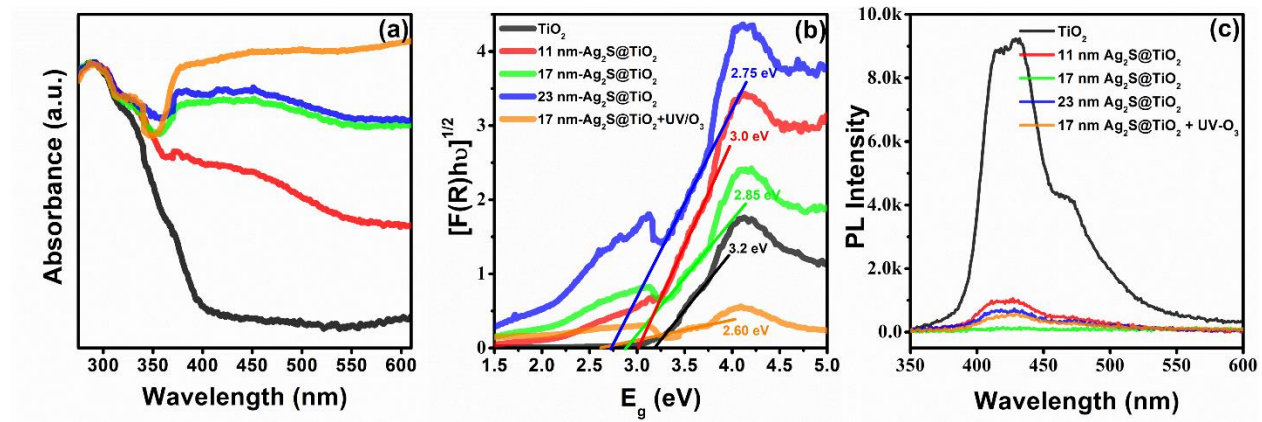

**Fig. S3.** (a) UV-vis diffuse reflectance spectra of  $\text{Ag}_2\text{S}@ \text{TiO}_2$  NFs (converted to absorbance), (b) Kubelka-Munk transformation showing the estimated bandgaps, and (c) the photoluminescence spectra recorded after 325 nm laser excitation. *The figure is reproduced from our previous work [1], available under the Creative Commons Attribution 4.0 International Public License.*

[1] S. Ghafoor, S. Ata, N. Mahmood and S. N. Arshad, *Sci. Rep.*, 2017, **7**, 255.
